# Supplementary material for: Effects of Acute Tryptophan Depletion on Brain Serotonin Function and Concentrations of Dopamine and Norepinephrine in C57BL/6J and BALB/cJ Mice
Source: PubMed Central journal article supplement (PMC3357407; doi:10.1371/journal.pone.0035916), 2012-05-21
Supplement: pone.0035916.s001.pdf [file pone.0035916.s001.pdf]

## Supplementary Online Material:

**Table S1: 4-WAY ANOVA**

| Factor                 | 5-HTP      |             |              | 5-HT  |        |          | 5-HIAA |        |          |
|------------------------|------------|-------------|--------------|-------|--------|----------|--------|--------|----------|
|                        | df         | F           | P            | df    | F      | P        | df     | F      | P        |
| Strain                 | 1,60       | 9.03        | < .004       | 1,60  | 6.06   | <.02     | 1,60   | 61.80  | <.000001 |
| Treatment (TRP+, TRP-) | 2,60       | 9.87        | <.0002       | 2,60  | 18.32  | <.000001 | 2,60   | 96.92  | <.000001 |
| NSD                    | 1,60       | 420.1       | <.000001     |       |        |          | 1,60   | 125.79 | <.000001 |
| Region                 | 2,115      | 148.8       | <.000001     | 2,112 | 24.90  | <.000001 | 2,118  | 720.45 | <.000001 |
| Strain x Treatment     | 2,60       | 2.93        | .061         | 2,60  | 3.54   | <.04     | 2,60   | 4.96   | <.02     |
| Strain x NSD           | 1,60       | 17.22       | <.0002       |       |        |          | 1,60   | 5.52   | <.03     |
| Strain x Region        | 2,115      | 21.57       | <.000001     | 2,112 | 12.86  | <.000001 | 2,118  | 61.27  | <.000001 |
| Treatment x NSD        | 2,60       | 12.07       | <.00004      |       |        |          | 2,60   | 3.00   | .057     |
| Treatment x Region     | 4,115      | 5.26        | <.0007       | 4,112 | 1.26   | .288     | 4,118  | 42.24  | <.000001 |
| NSD x Region           | 4,115      | 163.57      | <.00001      |       |        |          | 2,118  | 31.31  | <.000001 |
| Factor                 | Tryptophan |             |              | NE    |        |          | DA     |        |          |
|                        | df         | F           | P            | df    | F      | P        | df     | F      | P        |
| Strain                 | 1,60       | 0.05        | <b>0.828</b> | 1,60  | 96.54  | <.000001 | 1,60   | 5.22   | <.03     |
| Treatment (TRP+, TRP-) | 2,60       | 31.34       | <.000001     | 2,60  | .20    | .820     | 2,60   | 1.61   | .327     |
| NSD                    | 1,60       | 1.14        | .291         | 1,60  | 1.30   | .259     | 1,60   | 8.35   | <.006    |
| Region                 | 2,117      | 12.59       | <.00002      | 2,118 | 1.91   | .152     | 2,114  | 96.18  | <.000001 |
| Strain x Treatment     | 2,60       | 1.07        | .349         | 2,60  | .05    | .952     | 2,60   | 1.71   | .190     |
| Strain x NSD           | 1,60       | 0.25        | .621         | 1,60  | .26    | .612     | 1,60   | 0.84   | .362     |
| Strain x Region        | 2,117      | 1.95        | .147         | 2,118 | .58    | .559     | 2,114  | 4.56   | .012     |
| Treatment x NSD        | 2,60       | 0.09        | .911         | 2,50  | 0.00   | .999     | 2,60   | 0.04   | .956     |
| Treatment x Region     | 4,117      | 0.83        | .508         | 4,118 | 1.12   | .348     | 4,114  | 1.59   | .181     |
| NSD x Region           | 4,117      | 0.15        | .861         | 2,118 | 1.93   | .149     | 2,114  | 1.61   | .205     |
| Factor                 | DOPAC      |             |              | HVA   |        |          |        |        |          |
|                        | df         | F           | P            | df    | F      | P        | df     | F      | P        |
| Strain                 | 1,60       | <b>7.43</b> | <.009        | 1,60  | 8.30   | <.006    |        |        |          |
| Treatment (TRP+, TRP-) | 2,60       | 1.73        | .186         | 2,60  | 2.11   | .130     |        |        |          |
| NSD                    | 1,60       | 46.73       | <.000001     | 1,60  | 1.35   | .250     |        |        |          |
| Region                 | 2,116      | 146.19      | <.000001     | 2,116 | 275.84 | <.000001 |        |        |          |
| Strain x Treatment     | 2,60       | 2.87        | .065         | 2,60  | 2.14   | .126     |        |        |          |
| Strain x NSD           | 1,60       | 1.77        | .188         | 1,60  | 0.21   | .649     |        |        |          |
| Strain x Region        | 2,116      | 1.83        | .165         | 2,116 | 3.12   | <.05     |        |        |          |
| Treatment x NSD        | 2,60       | 0.03        | .970         | 2,60  | 0.01   | .991     |        |        |          |
| Treatment x Region     | 4,116      | 1.44        | .226         | 4,116 | 2.11   | .085     |        |        |          |
| NSD x Region           | 4,116      | 25.47       | <.000001     | 2,116 | 1.40   | .252     |        |        |          |
