# Supplementary material for: Effects of Acute Tryptophan Depletion on Brain Serotonin Function and Concentrations of Dopamine and Norepinephrine in C57BL/6J and BALB/cJ Mice
Source: PubMed Central journal article supplement (PMC3357407; doi:10.1371/journal.pone.0035916), 2012-05-21
Supplement: pone.0035916.s002.pdf [file pone.0035916.s002.pdf]

## Supplementary Online Material:

| Table S2                        |        |                          |    |                         |    |                         |    |                         |    |                          |    |
|---------------------------------|--------|--------------------------|----|-------------------------|----|-------------------------|----|-------------------------|----|--------------------------|----|
| TRP and Neurotransmitter Levels |        |                          |    |                         |    |                         |    |                         |    |                          |    |
| PFC                             |        |                          |    |                         |    |                         |    |                         |    |                          |    |
| Strain                          | Treat. | TRP<br>(ng/mg<br>tissue) | N  | NE<br>(ng/mg<br>tissue) | N  | DA<br>(ng/mg<br>tissue) | N  | DOPAC<br>(ng/mg tissue) | N  | HVA<br>(ng/mg<br>tissue) | N  |
| BALBc                           | Water  | 2.14 ± 0.09              | 12 | 0.14 ± 0.01             | 12 | 0.058 ± 0.010           | 12 | 0.021 ± 0.004           | 12 | 0.13 ± 0.02              | 12 |
|                                 | TRP+   | 2.63 ± 0.18              | 11 | 0.15 ± 0.02             | 12 | 0.078 ± 0.017           | 12 | 0.028 ± 0.006           | 12 | 0.16 ± 0.02              | 12 |
|                                 | TRP-   | 1.39 ± 0.15              | 12 | 0.16 ± 0.01             | 12 | 0.049 ± 0.008           | 12 | 0.021 ± 0.004           | 12 | 0.13 ± 0.01              | 12 |
| C57                             | Water  | 2.11 ± 0.13              | 12 | 0.23 ± 0.01             | 12 | 0.027 ± 0.005           | 10 | 0.018 ± 0.004           | 12 | 0.11 ± 0.01              | 12 |
|                                 | TRP+   | 3.24 ± 0.42              | 12 | 0.25 ± 0.02             | 12 | 0.030 ± 0.006           | 12 | 0.013 ± 0.003           | 12 | 0.098 ± 0.007            | 12 |
|                                 | TRP-   | 1.14 ± 0.09              | 12 | 0.25 ± 0.02             | 12 | 0.040 ± 0.006           | 12 | 0.015 ± 0.002           | 12 | 0.10 ± 0.01              | 12 |
| FC                              |        |                          |    |                         |    |                         |    |                         |    |                          |    |
| Strain                          | Treat  | TRP<br>(ng/mg<br>tissue) | N  | NE<br>(ng/mg<br>tissue) | N  | DA<br>(ng/mg<br>tissue) | N  | DOPAC<br>(ng/mg tissue) | N  | HVA<br>(ng/mg<br>tissue) | N  |
| BALBc                           | Water  | 2.71 ± 0.15              | 12 | 0.14 ± 0.02             | 12 | 0.09 ± 0.01             | 12 | 0.026 ± 0.005           | 12 | 0.14 ± 0.01              | 12 |
|                                 | TRP+   | 3.40 ± 0.30              | 11 | 0.15 ± 0.01             | 12 | 0.11 ± 0.02             | 12 | 0.041 ± 0.005           | 12 | 0.18 ± 0.02              | 12 |
|                                 | TRP-   | 1.68 ± 0.14              | 12 | 0.14 ± 0.01             | 12 | 0.066 ± 0.008           | 11 | 0.023 ± 0.005           | 11 | 0.121 ± 0.009            | 11 |
| C57                             | Water  | 2.57 ± 0.17              | 12 | 0.23 ± 0.01             | 12 | 0.10 ± 0.02             | 11 | 0.029 ± 0.005           | 12 | 0.143 ± 0.009            | 12 |
|                                 | TRP+   | 3.36 ± 0.38              | 12 | 0.24 ± 0.01             | 12 | 0.09 ± 0.01             | 12 | 0.025 ± 0.003           | 12 | 0.134 ± 0.007            | 12 |
|                                 | TRP-   | 1.41 ± 0.14              | 12 | 0.26 ± 0.01             | 12 | 0.08 ± 0.01             | 12 | 0.025 ± 0.004           | 12 | 0.119 ± 0.009            | 12 |
| HPC                             |        |                          |    |                         |    |                         |    |                         |    |                          |    |
| Strain                          | Treat  | TRP<br>(ng/mg<br>tissue) | N  | NE<br>(ng/mg<br>tissue) | N  | DA<br>(ng/mg<br>tissue) | N  | DOPAC<br>(ng/mg tissue) | N  | HVA<br>(ng/mg<br>tissue) | N  |
| BALBc                           | Water  | 2.42±0.12                | 11 | 0.16 ± 0.02             | 12 | 0.018 ± 0.003           | 12 | 0.006 ± 0.002           | 12 | 0.033 ± 0.004            | 12 |
|                                 | TRP+   | 3.11±0.31                | 12 | 0.14 ± 0.01             | 12 | 0.025 ± 0.005           | 12 | 0.012 ± 0.003           | 12 | 0.042 ± 0.005            | 12 |
|                                 | TRP-   | 1.55±0.14                | 12 | 0.15 ± 0.02             | 12 | 0.023 ± 0.004           | 12 | 0.007 ± 0.001           | 12 | 0.038 ± 0.005            | 12 |
| C57                             | Water  | 2.54±0.23                | 12 | 0.26 ± 0.02             | 12 | 0.014 ± 0.003           | 12 | 0.003 ± 0.001           | 12 | 0.024 ± 0.003            | 12 |
|                                 | TRP+   | 3.74 ± 0.64              | 12 | 0.26 ± 0.01             | 10 | 0.015 ± 0.002           | 11 | 0.004 ± 0.001           | 11 | 0.027 ± 0.002            | 10 |
|                                 | TRP-   | 1.28 ± 0.12              | 12 | 0.25 ± 0.02             | 12 | 0.015 ± 0.003           | 11 | 0.004 ± 0.001           | 11 | 0.028 ± 0.003            | 11 |

(Table S2 continued)

| PFC    |           |         |                      |   |                     |   |                       |   |
|--------|-----------|---------|----------------------|---|---------------------|---|-----------------------|---|
| Strain | Treatment | NSD1015 | 5-HTP (ng/mg tissue) | N | 5-HT (ng/mg tissue) | N | 5-HIAA (ng/mg tissue) | N |
| BALBc  | Water     | yes     | 0.078 ± 0.005        | 6 | 0.41 ± 0.02         | 6 | 0.073 ± 0.010         | 6 |
|        |           | no      | 0.018 ± 0.010        | 6 | 0.40 ± 0.07         | 5 | 0.122 ± 0.004         | 6 |
|        | TRP+      | yes     | 0.094 ± 0.012        | 6 | 0.49 ± 0.04         | 6 | 0.104 ± 0.013         | 6 |
|        |           | no      | 0.007 ± 0.002        | 5 | 0.51 ± 0.04         | 6 | 0.148 ± 0.008         | 6 |
|        | TRP-      | yes     | 0.065 ± 0.008        | 6 | 0.38 ± 0.03         | 6 | 0.041 ± 0.003         | 6 |
|        |           | no      | 0.014 ± 0.005        | 5 | 0.37 ± 0.03         | 6 | 0.076 ± 0.006         | 6 |
| C57    | Water     | yes     | 0.118 ± 0.015        | 6 | 0.46 ± 0.03         | 6 | 0.095 ± 0.007         | 6 |
|        |           | no      | 0.006 ± 0.004        | 6 | 0.42 ± 0.03         | 6 | 0.146 ± 0.013         | 6 |
|        | TRP+      | yes     | 0.105 ± 0.014        | 6 | 0.43 ± 0.03         | 6 | 0.094 ± 0.011         | 6 |
|        |           | no      | 0.004 ± 0.001        | 5 | 0.36 ± 0.02         | 5 | 0.182 ± 0.014         | 6 |
|        | TRP-      | yes     | 0.059 ± 0.010        | 6 | 0.31 ± 0.02         | 6 | 0.051 ± 0.005         | 6 |
|        |           | no      | 0.006 ± 0.003        | 6 | 0.34 ± 0.03         | 5 | 0.085 ± 0.009         | 6 |
| FC     |           |         |                      |   |                     |   |                       |   |
| Strain | Treatment | NSD1015 | 5-HTP (ng/mg tissue) | N | 5-HT (ng/mg tissue) | N | 5-HIAA (ng/mg tissue) | N |
| BALBc  | Water     | yes     | 0.062 ± 0.013        | 6 | 0.28 ± 0.03         | 6 | 0.052 ± 0.007         | 6 |
|        |           | no      | 0.015 ± 0.006        | 6 | 0.32 ± 0.03         | 6 | 0.103 ± 0.017         | 6 |
|        | TRP+      | yes     | 0.083 ± 0.015        | 6 | 0.54 ± 0.15         | 6 | 0.092 ± 0.019         | 6 |
|        |           | no      | 0.017 ± 0.005        | 6 | 0.35 ± 0.04         | 6 | 0.128 ± 0.007         | 6 |
|        | TRP-      | yes     | 0.060 ± 0.013        | 6 | 0.21 ± 0.02         | 6 | 0.036 ± 0.006         | 6 |
|        |           | no      | 0.021 ± 0.007        | 6 | 0.25 ± 0.02         | 6 | 0.069 ± 0.007         | 6 |
| C57    | Water     | yes     | 0.095 ± 0.011        | 6 | 0.36 ± 0.02         | 5 | 0.081 ± 0.006         | 6 |
|        |           | no      | 0.005 ± 0.004        | 5 | 0.40 ± 0.04         | 5 | 0.137 ± 0.011         | 6 |
|        | TRP+      | yes     | 0.104 ± 0.010        | 6 | 0.40 ± 0.03         | 5 | 0.094 ± 0.006         | 6 |
|        |           | no      | 0.008 ± 0.004        | 6 | 0.36 ± 0.01         | 6 | 0.146 ± 0.005         | 6 |
|        | TRP-      | yes     | 0.050 ± 0.009        | 6 | 0.29 ± 0.03         | 5 | 0.043 ± 0.004         | 6 |
|        |           | no      | 0.014 ± 0.007        | 6 | 0.36 ± 0.05         | 6 | 0.090 ± 0.006         | 6 |
| HPC    |           |         |                      |   |                     |   |                       |   |
| Strain | Treatment | NSD1015 | 5-HTP (ng/mg tissue) | N | 5-HT (ng/mg tissue) | N | 5-HIAA (ng/mg tissue) | N |
| BALBc  | Water     | yes     | 0.146 ± 0.011        | 6 | 0.39 ± 0.05         | 6 | 0.178 ± 0.019         | 6 |
|        |           | no      | 0.007 ± 0.002        | 6 | 0.45 ± 0.04         | 6 | 0.323 ± 0.031         | 6 |
|        | TRP+      | yes     | 0.146 ± 0.014        | 6 | 0.47 ± 0.02         | 6 | 0.222 ± 0.016         | 6 |
|        |           | no      | 0.014 ± 0.004        | 6 | 0.41 ± 0.04         | 6 | 0.099 ± 0.022         | 6 |
|        | TRP-      | yes     | 0.115 ± 0.003        | 6 | 0.32 ± 0.03         | 6 | 0.282 ± 0.006         | 5 |
|        |           | no      | 0.007 ± 0.003        | 6 | 0.33 ± 0.03         | 6 | 0.161 ± 0.014         | 6 |
| C57    | Water     | yes     | 0.238 ± 0.012        | 6 | 0.53 ± 0.03         | 6 | 0.304 ± 0.028         | 6 |
|        |           | no      | 0.010 ± 0.003        | 6 | 0.61 ± 0.06         | 6 | 0.460 ± 0.044         | 6 |
|        | TRP+      | yes     | 0.269 ± 0.032        | 6 | 0.54 ± 0.04         | 6 | 0.327 ± 0.021         | 6 |
|        |           | no      | 0.006 ± 0.003        | 5 | 0.58 ± 0.04         | 5 | 0.129 ± 0.027         | 5 |
|        | TRP-      | yes     | 0.131 ± 0.016        | 6 | 0.39 ± 0.04         | 6 | 0.542 ± 0.012         | 6 |
|        |           | no      | 0.011 ± 0.006        | 6 | 0.45 ± 0.04         | 6 | 0.218 ± 0.015         | 6 |
